# Supplementary material for: Catalyst-free reductive cyclization of bis(2-aminophenyl) disulfide with CO2 in the presence of BH3NH3 to synthesize 2-unsubstituted benzothiazole derivatives
Source: Royal Society of Chemistry journal article supplement (doi:10.1039/d2ra03134e), 2022-01-01

## SUPPORTING INFORMATION

### **Catalyst-free reductive cyclization of bis(2-aminophenyl) disulfide with CO<sub>2</sub> in the presence of BH<sub>3</sub>NH<sub>3</sub> to synthesize 2-unsubstituted benzothiazole derivatives**

Xiao Li <sup>a,b,c</sup>, Zhenbao Liu <sup>a,b,c</sup>, Hailong Hong <sup>a,b,c</sup>, Limin Han<sup>a,b,c,d\*</sup>, Ning Zhu<sup>a,b,c\*</sup>

<sup>a</sup> College of Chemical Engineering, Inner Mongolia University of Technology, Hohhot, 010051, China

<sup>b</sup> Key Laboratory of CO<sub>2</sub> Resource Utilization at Universities of Inner Mongolia Autonomous Region, Hohhot, 010051, China

<sup>c</sup> Inner Mongolia Engineering Research Center for CO<sub>2</sub> Capture and Utilization, Hohhot, 010051, China

<sup>d</sup> Wu Hai Vocational & Technical College, Wu Hai, 010070, China

1 The  $^1\text{H}$  NMR of mechanistic study

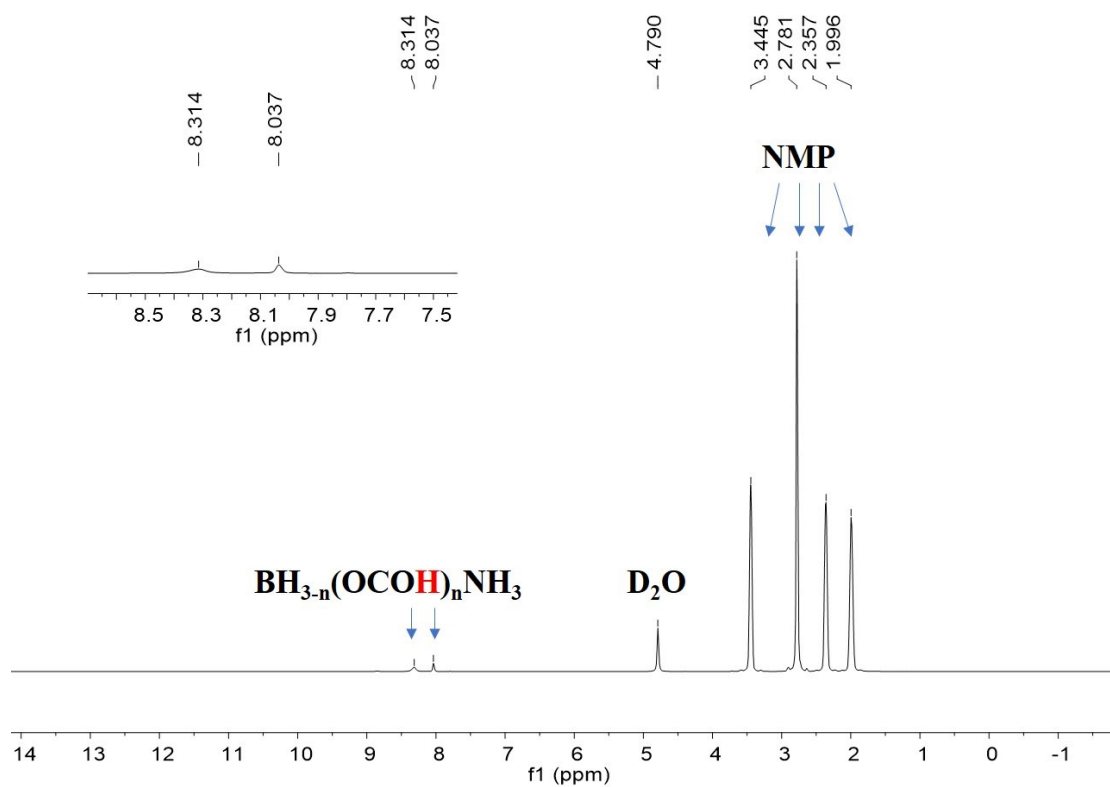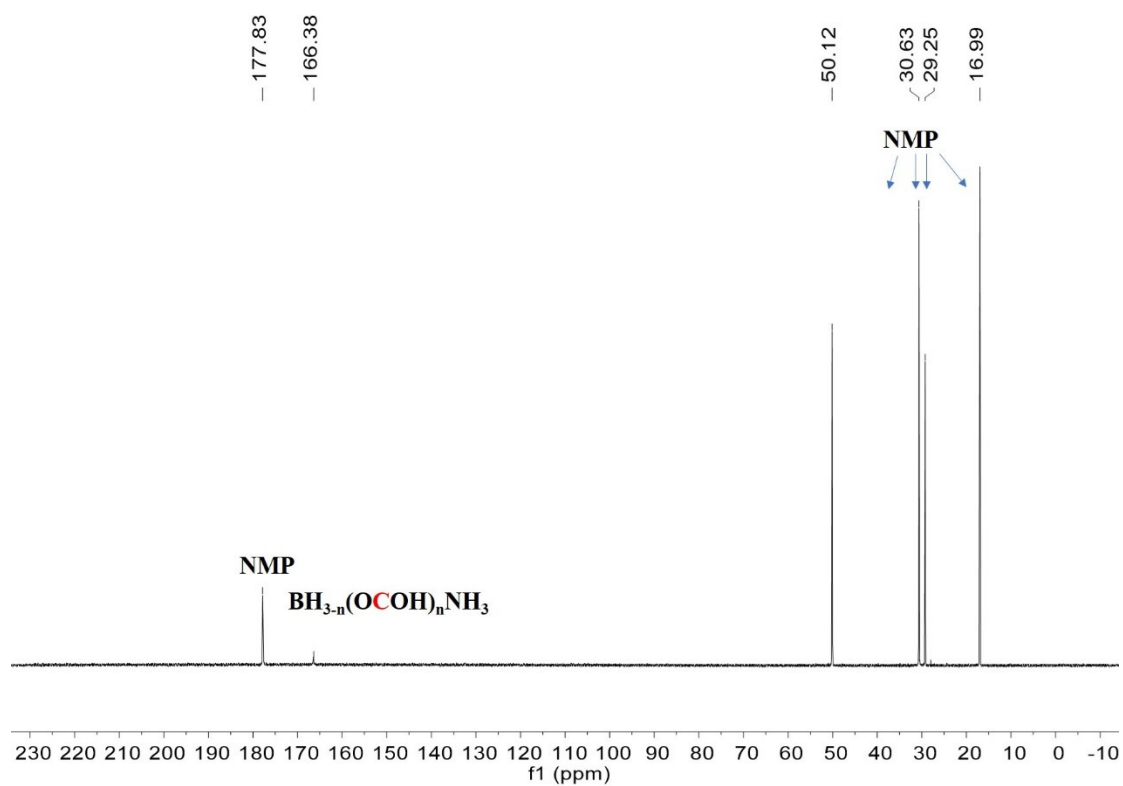

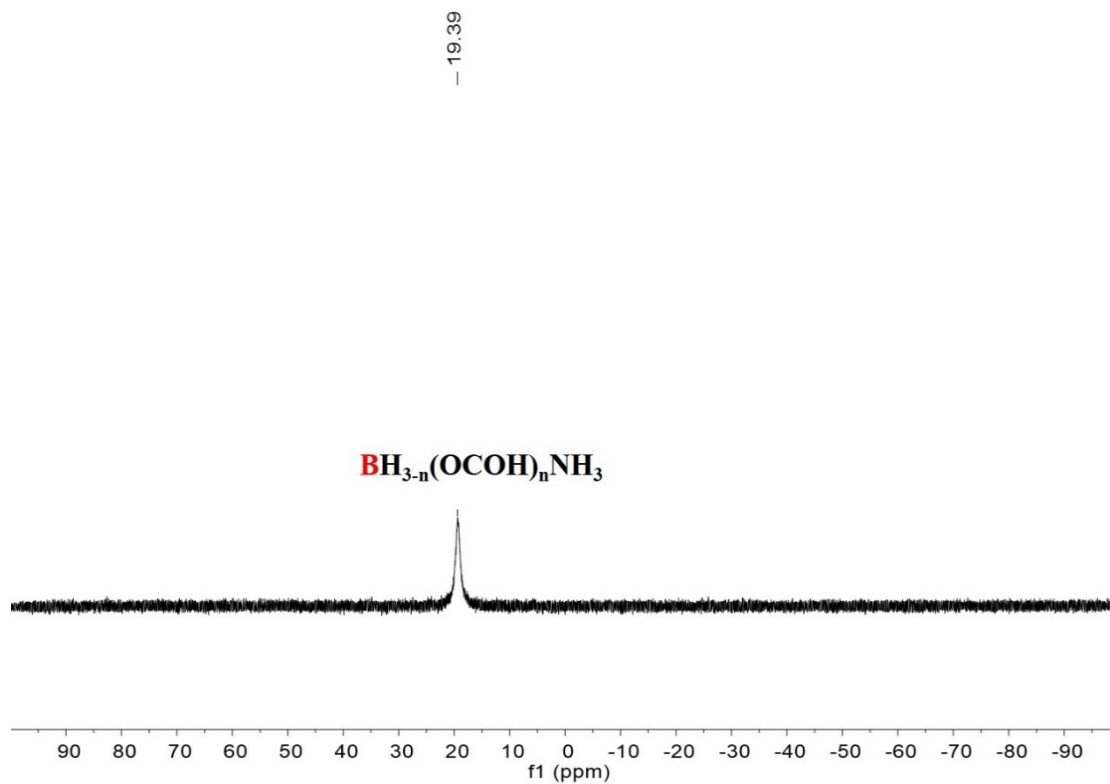

**Fig. S1** The <sup>1</sup>H NMR, <sup>13</sup>C NMR and <sup>11</sup>B NMR spectra for the reaction of BH<sub>3</sub>NH<sub>3</sub> and CO<sub>2</sub> in NMP.

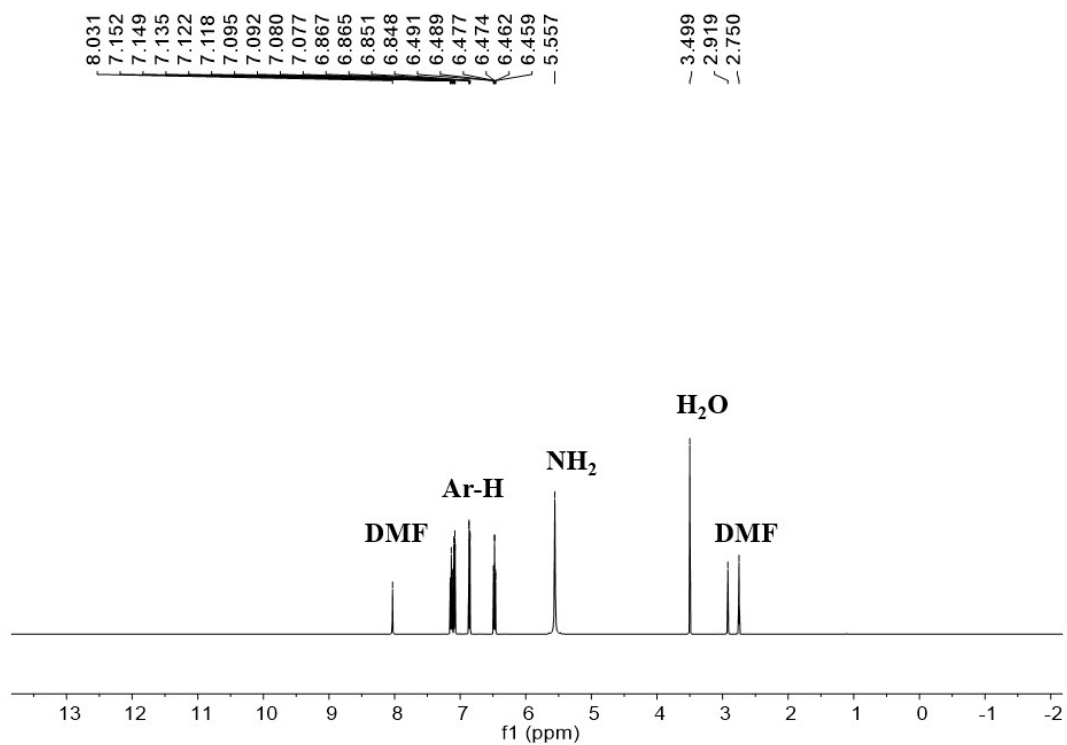

**Fig. S2** The <sup>1</sup>H NMR spectra of the **1a** in deuterated DMF

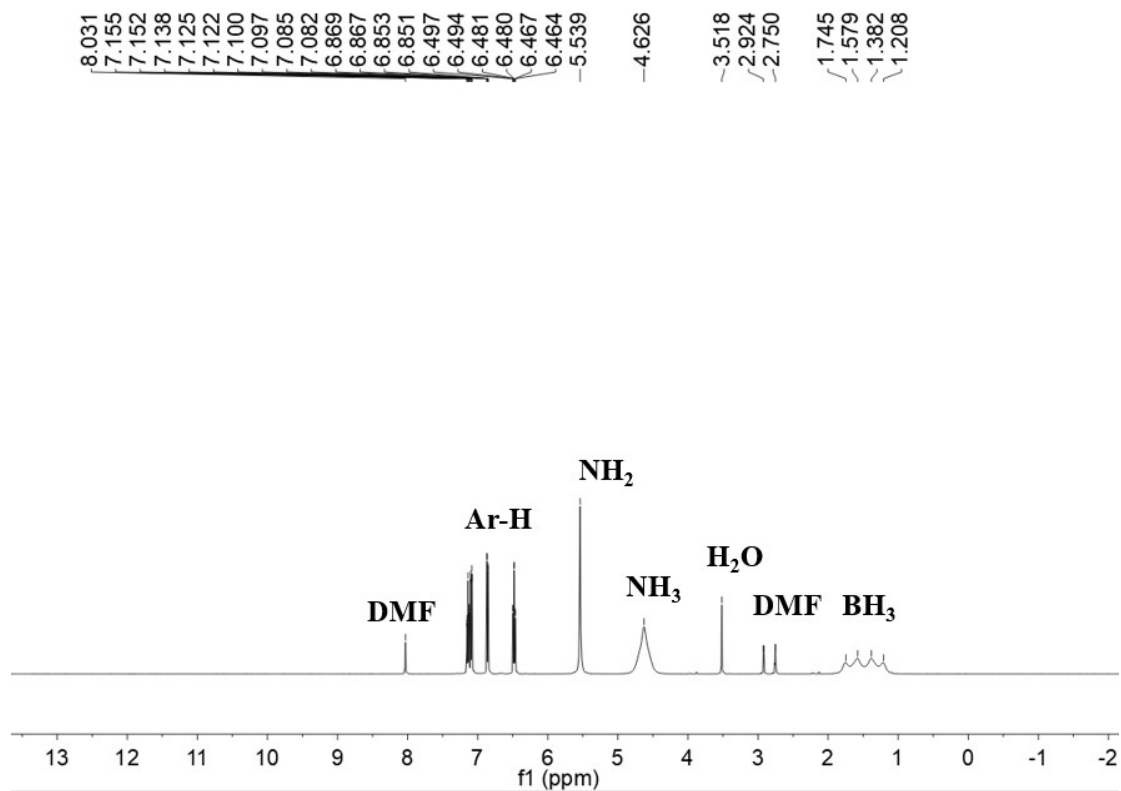

Fig. S3 The <sup>1</sup>H NMR spectra of the mixture of **1a** and BH<sub>3</sub>NH<sub>3</sub> in deuterated DMF

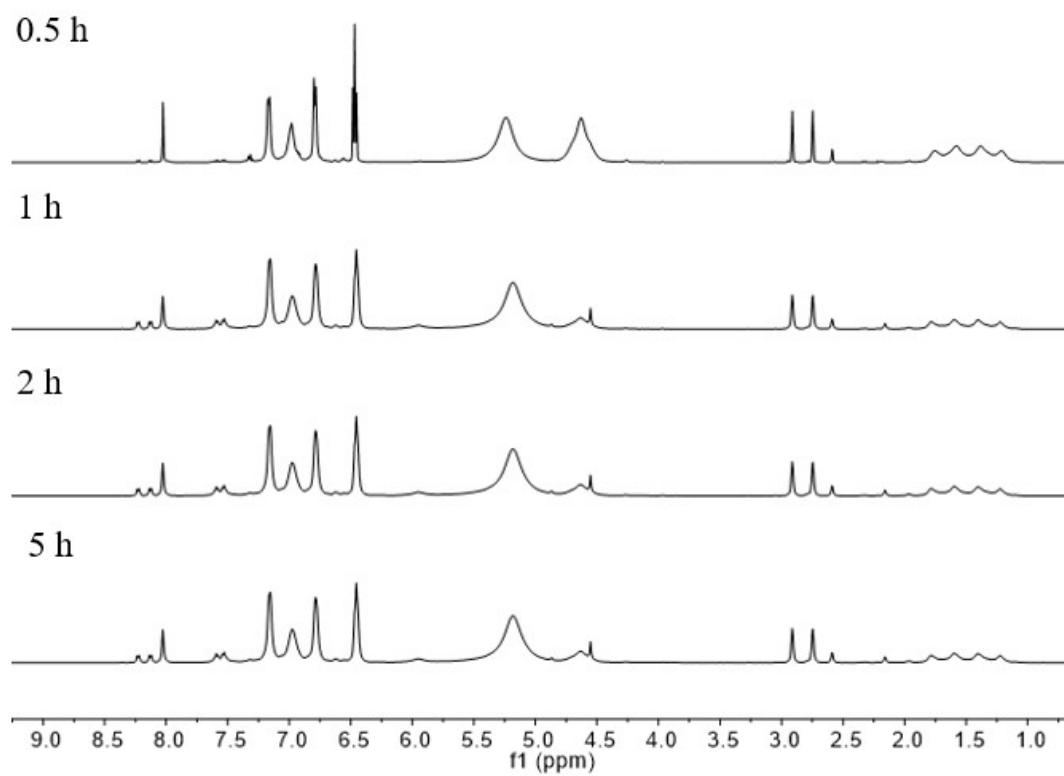

Fig. S4 The <sup>1</sup>H NMR spectra of the mixture solution of different time at 120 °C in deuterated DMF

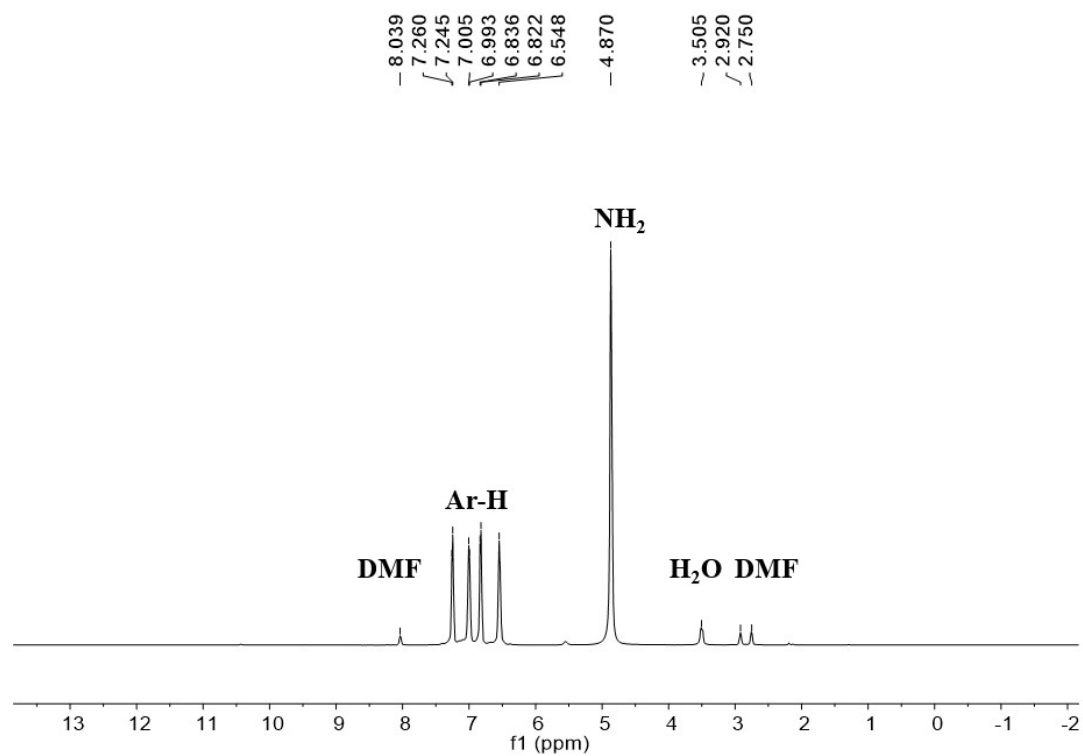

Fig. S5 The <sup>1</sup>H NMR spectra of the 2-aminothiophenol in deuterated DMF

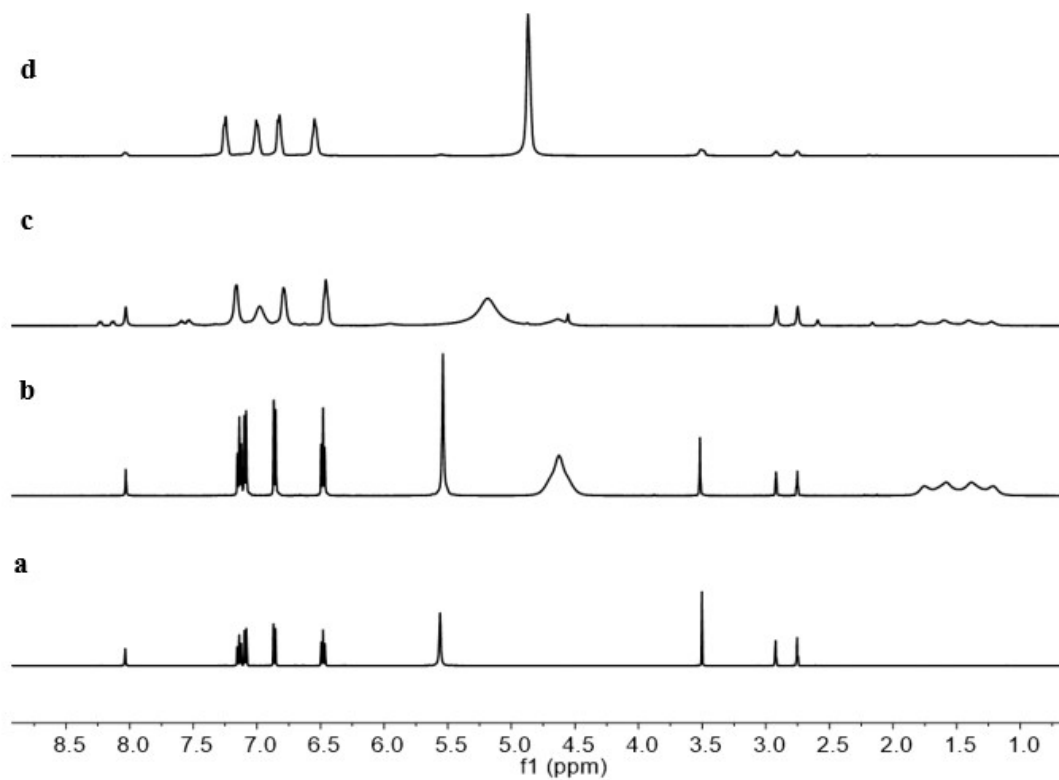

Fig. S6 The reaction of disulfide with BH<sub>3</sub>NH<sub>3</sub> detected by <sup>1</sup>H NMR in deuterated DMF. a: disulfide **1a**, b: the mixture of disulfide **1a** and BH<sub>3</sub>NH<sub>3</sub>, c: the reaction of disulfide with BH<sub>3</sub>NH<sub>3</sub> for 1h, d: 2-aminothiophenol.

## 2. <sup>1</sup>H and <sup>13</sup>C NMR spectra of the products

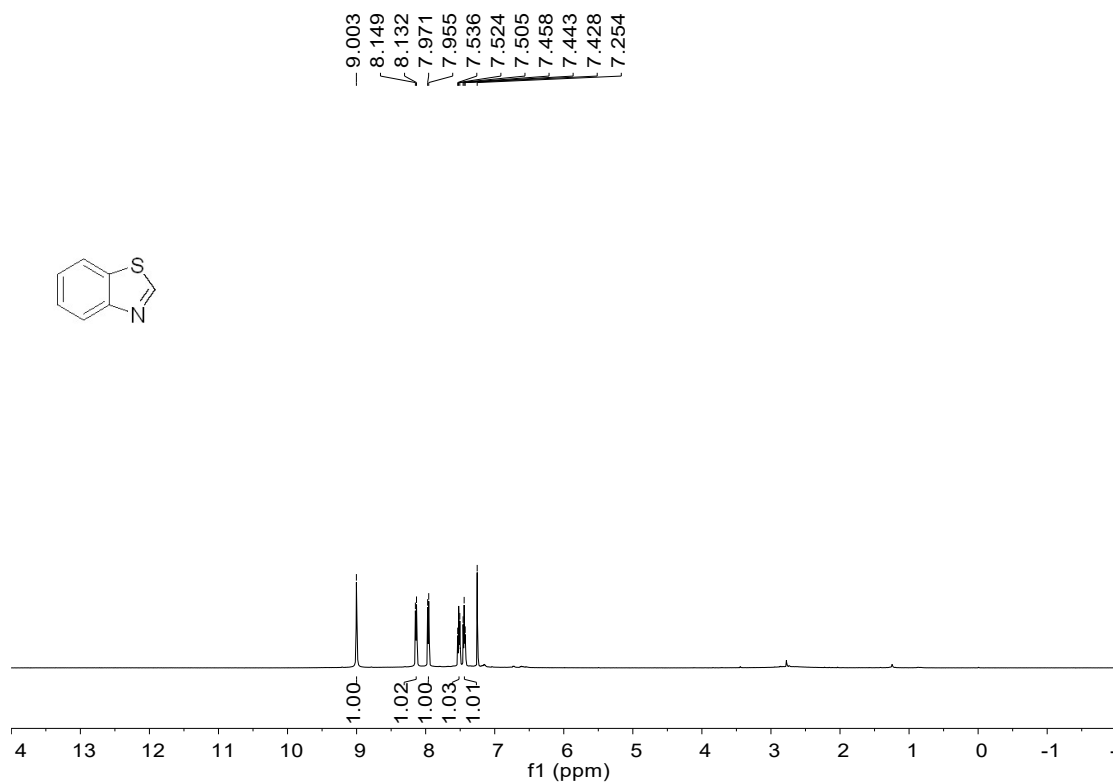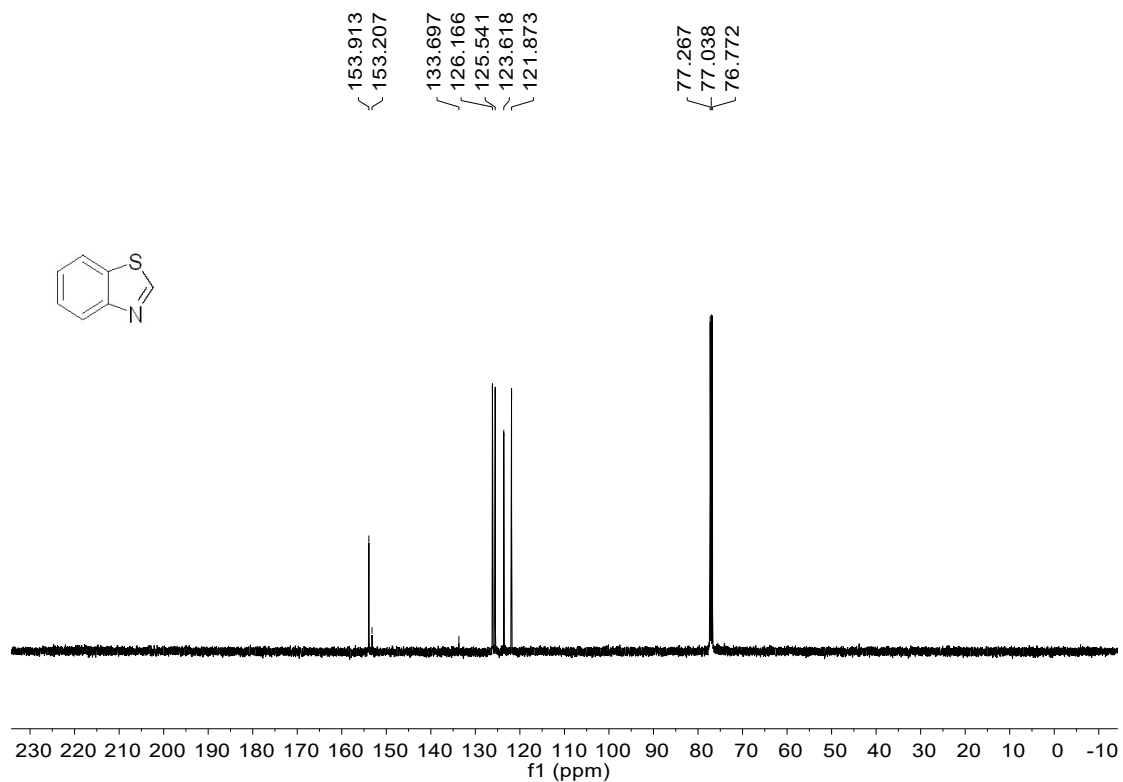

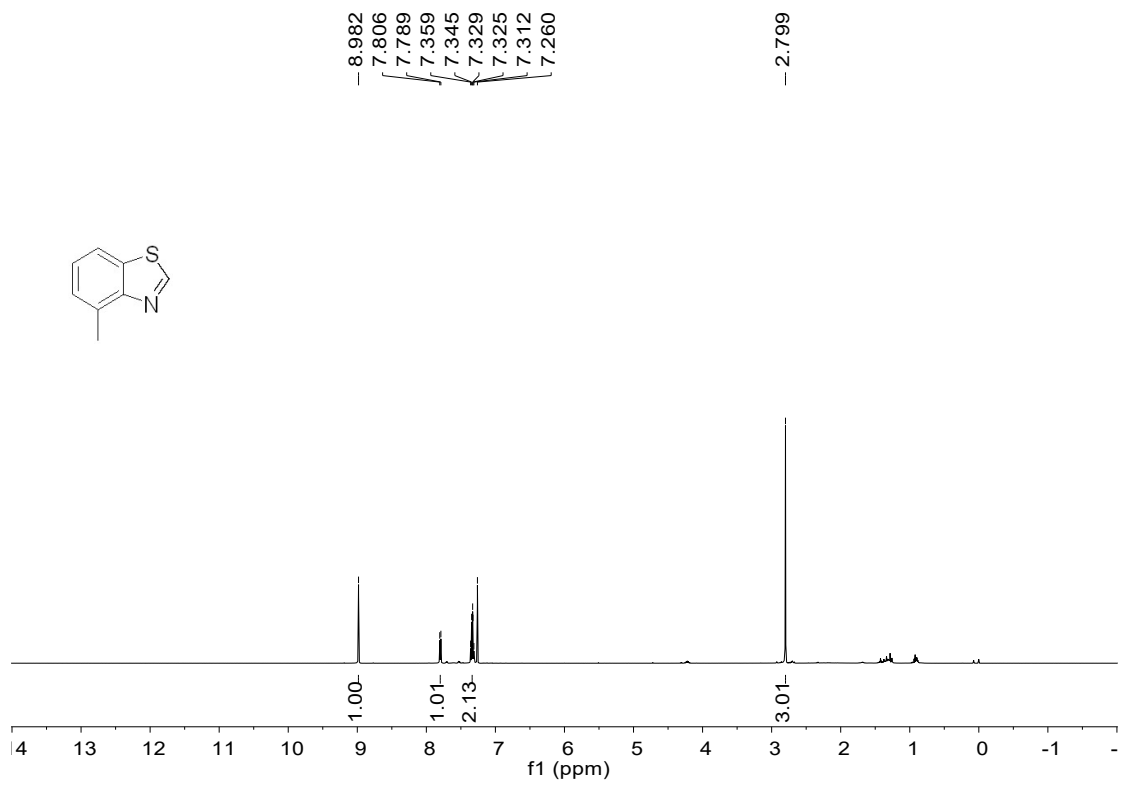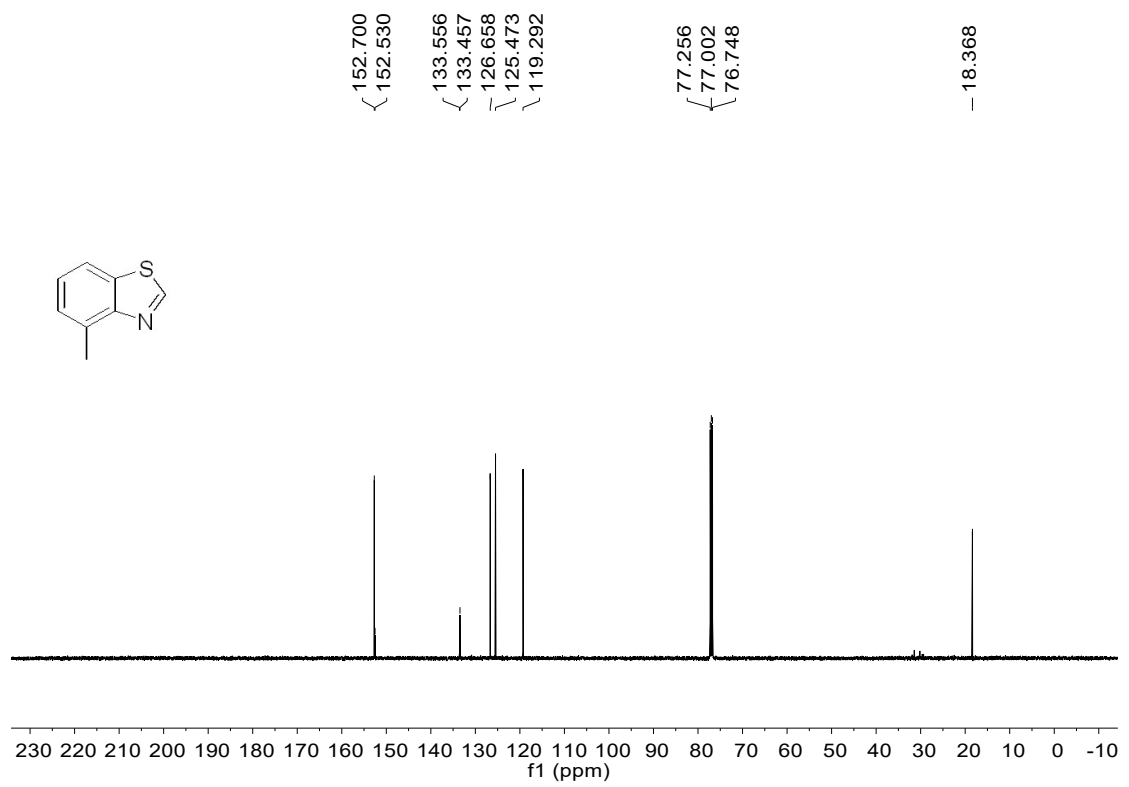

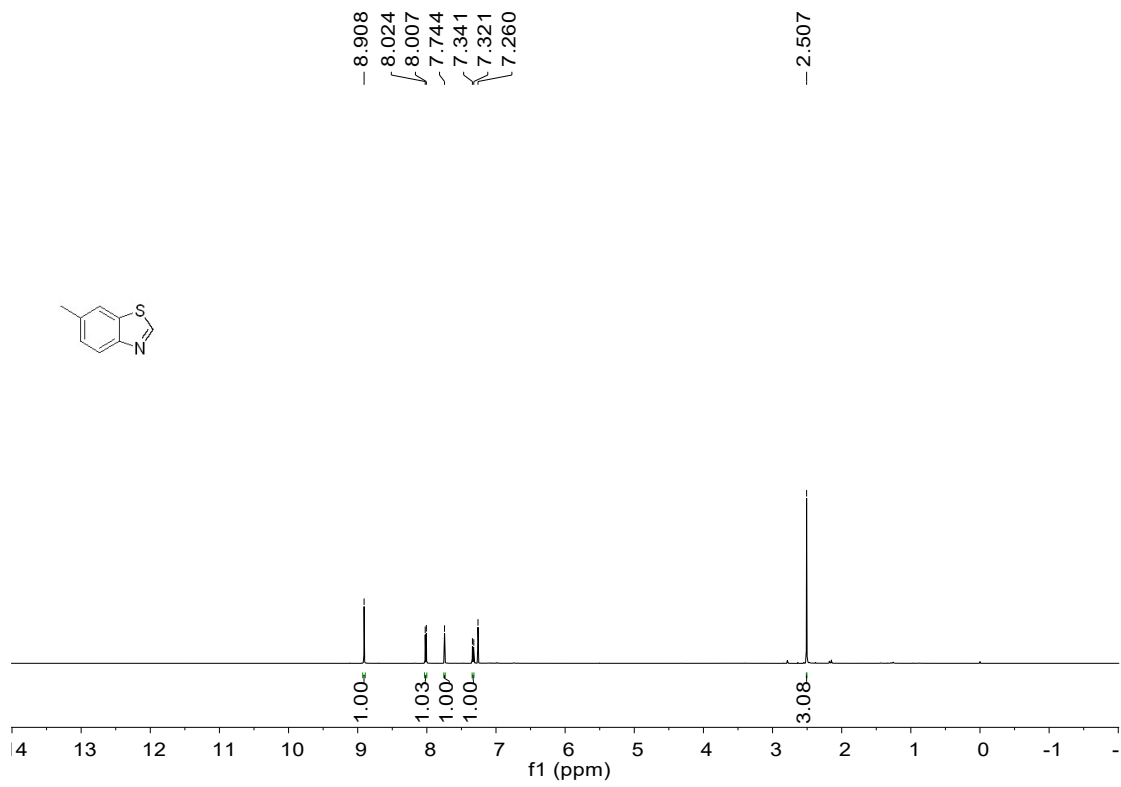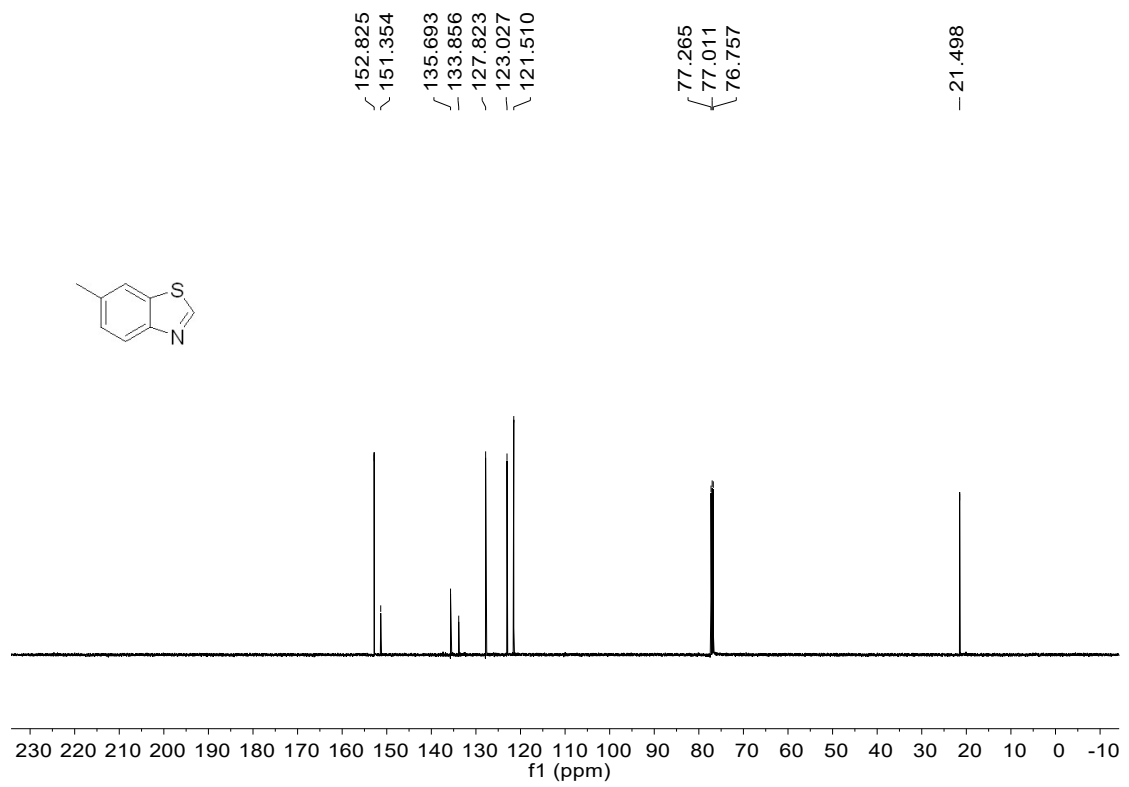



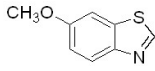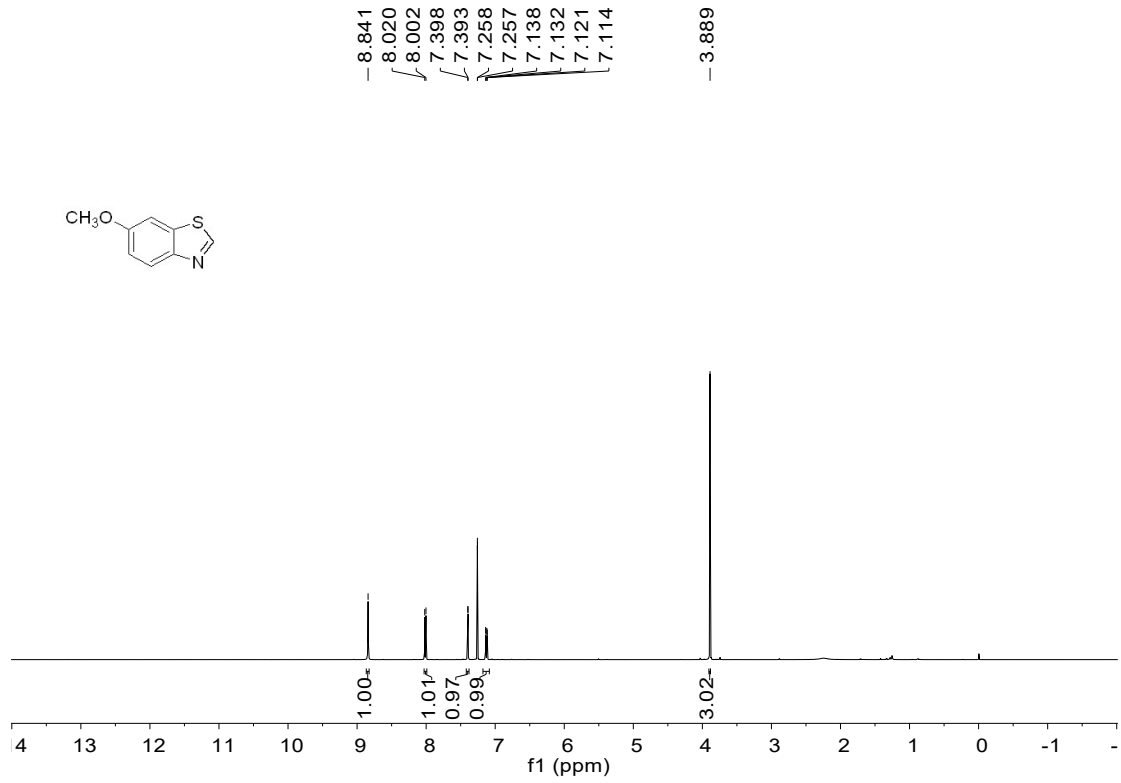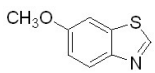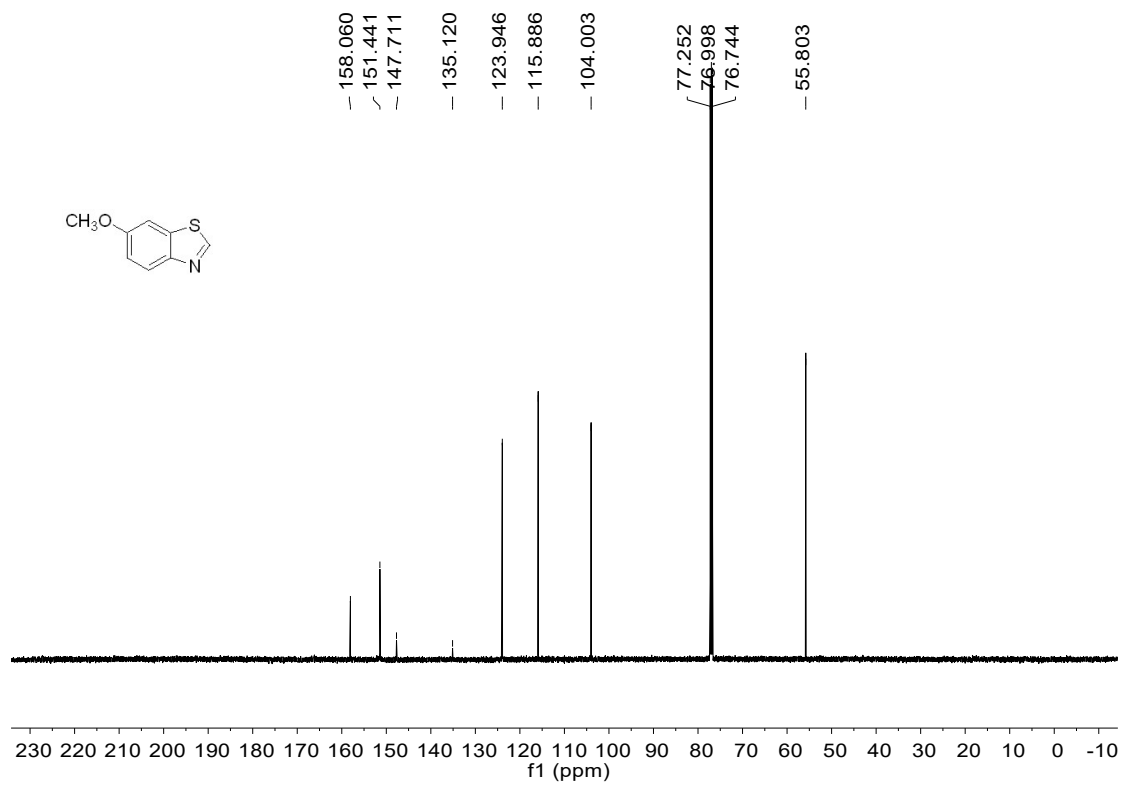

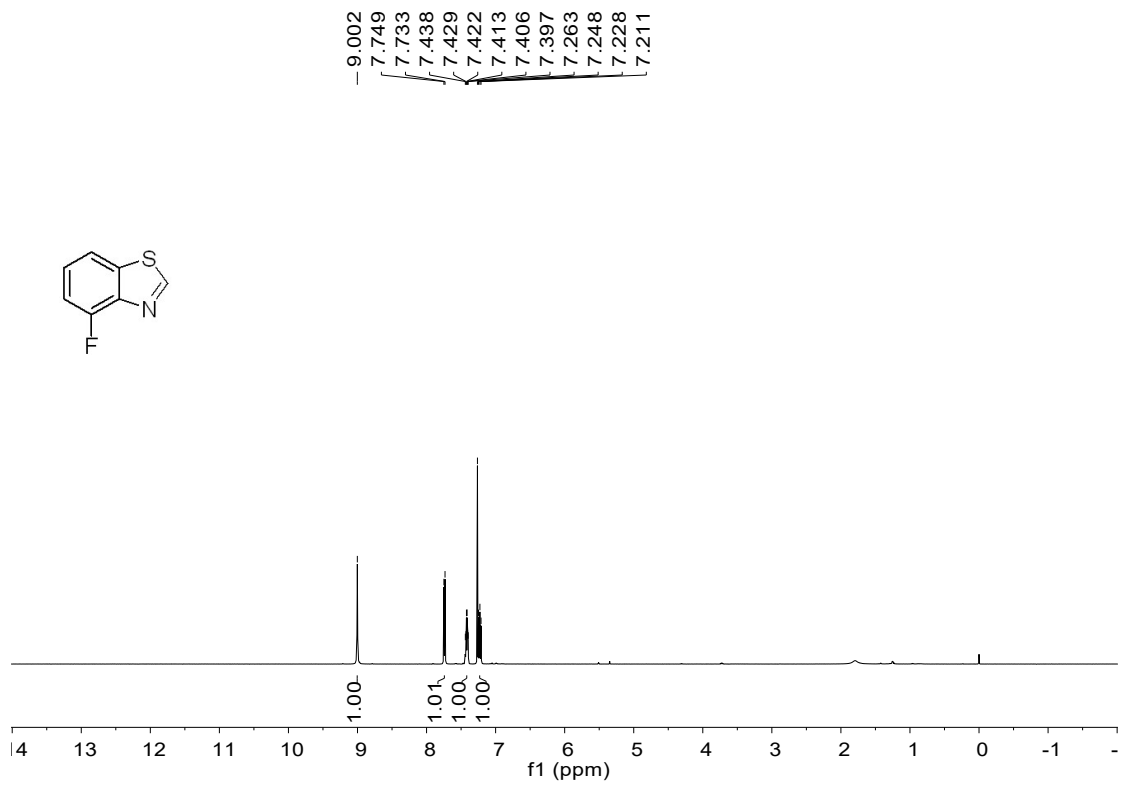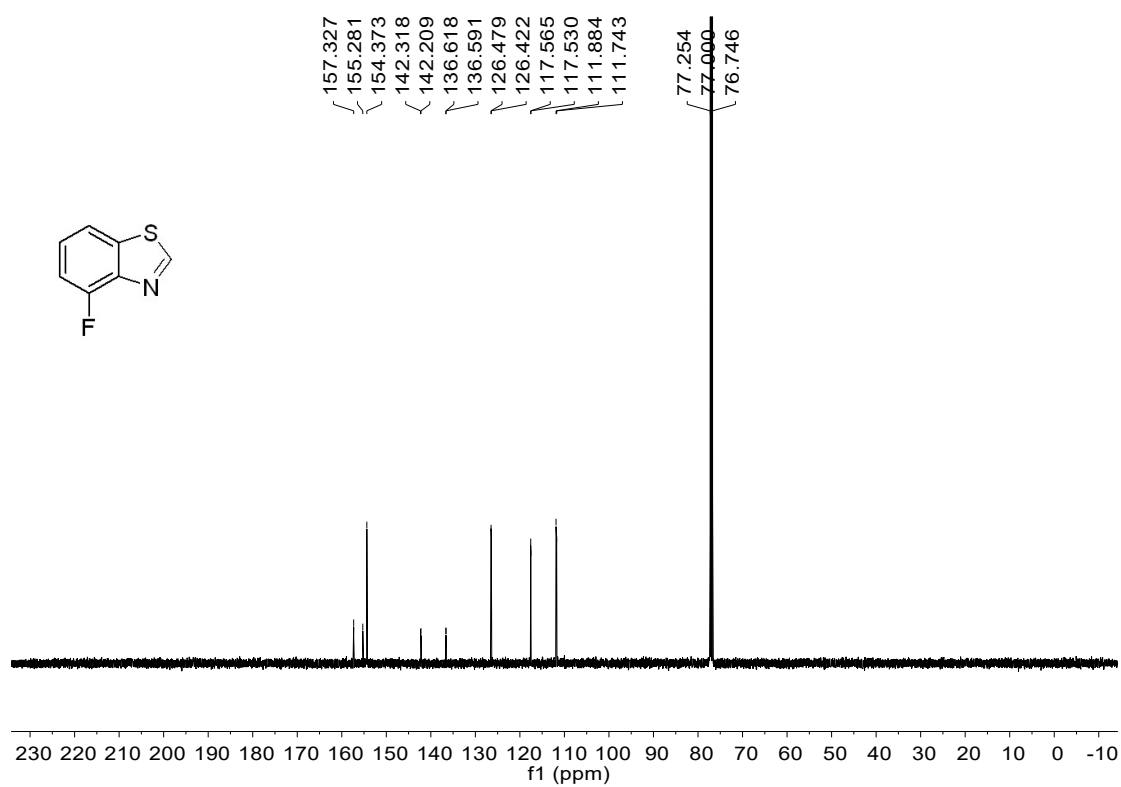

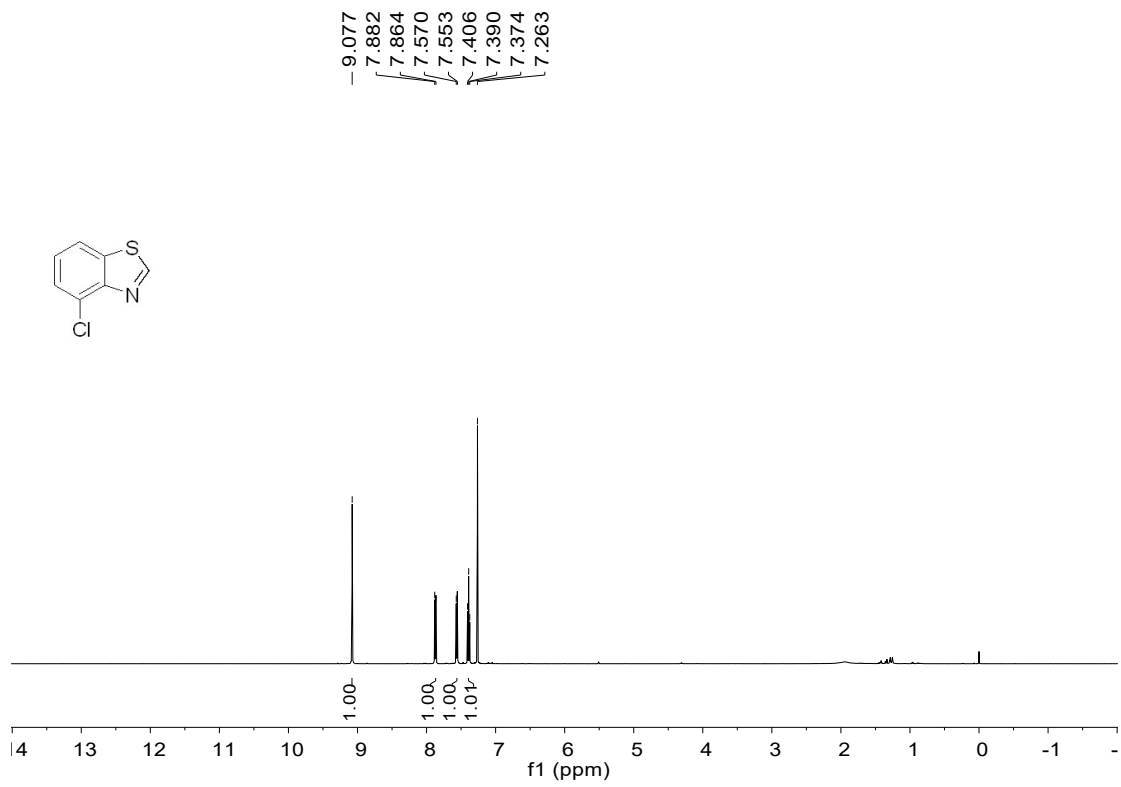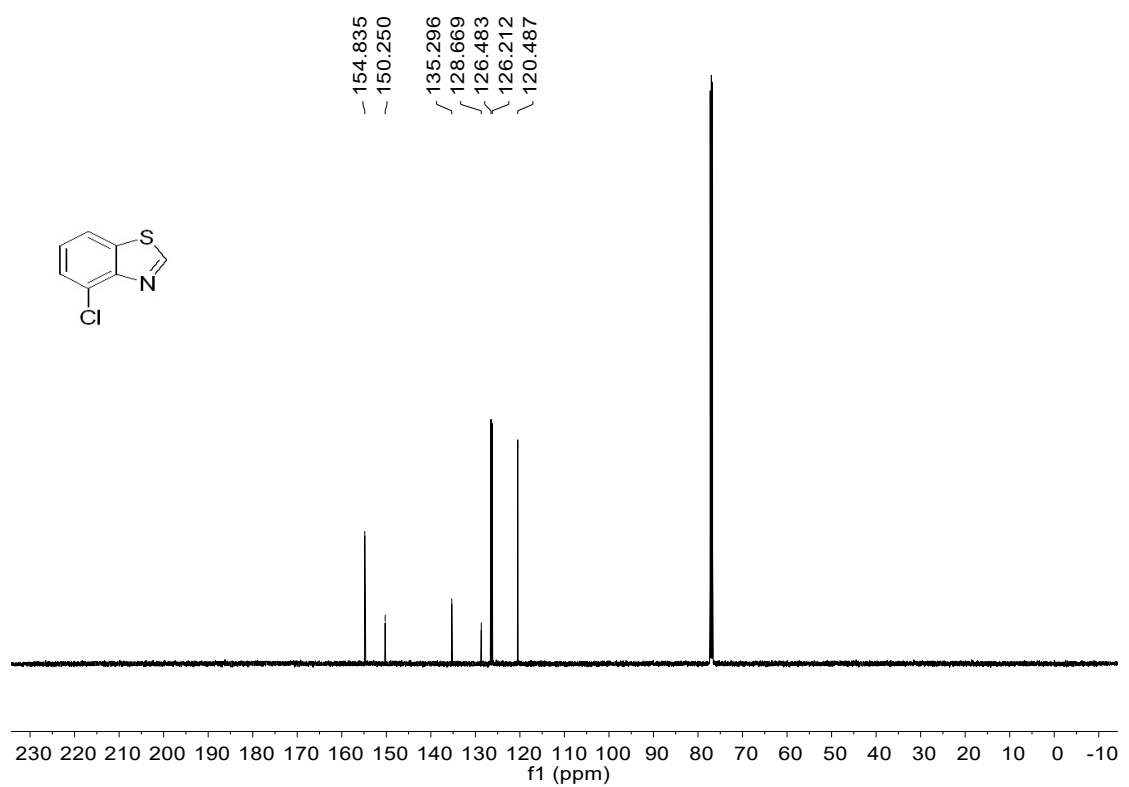

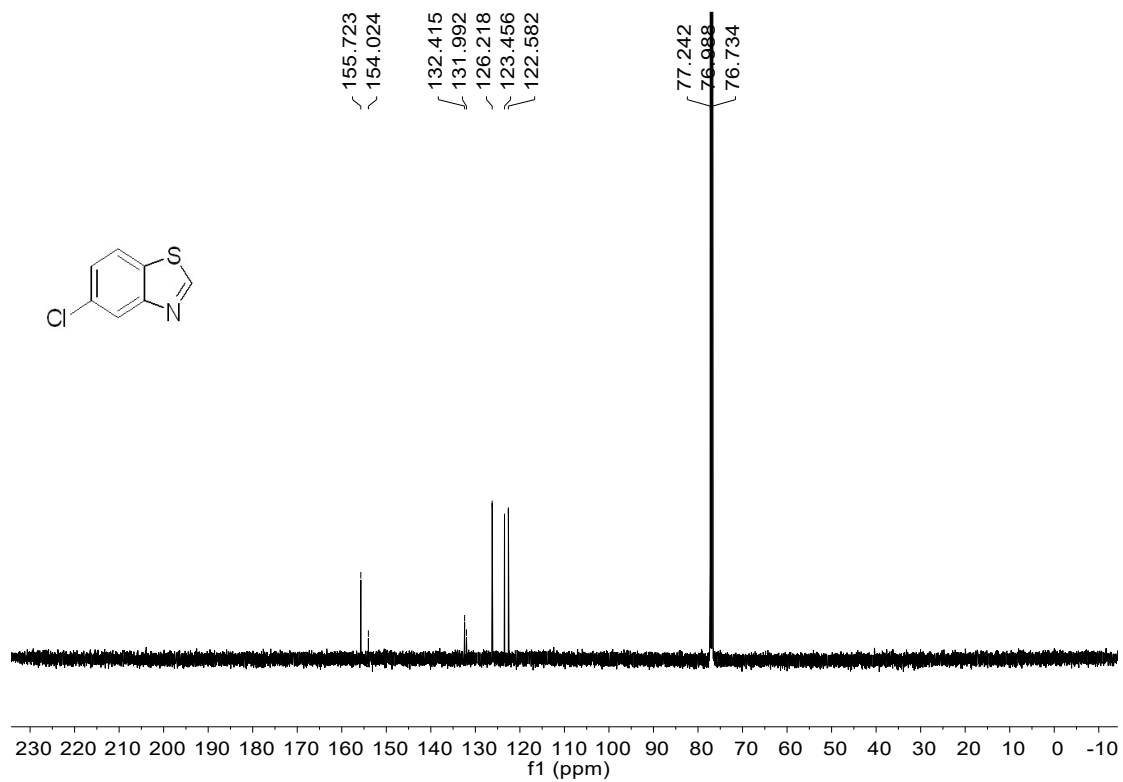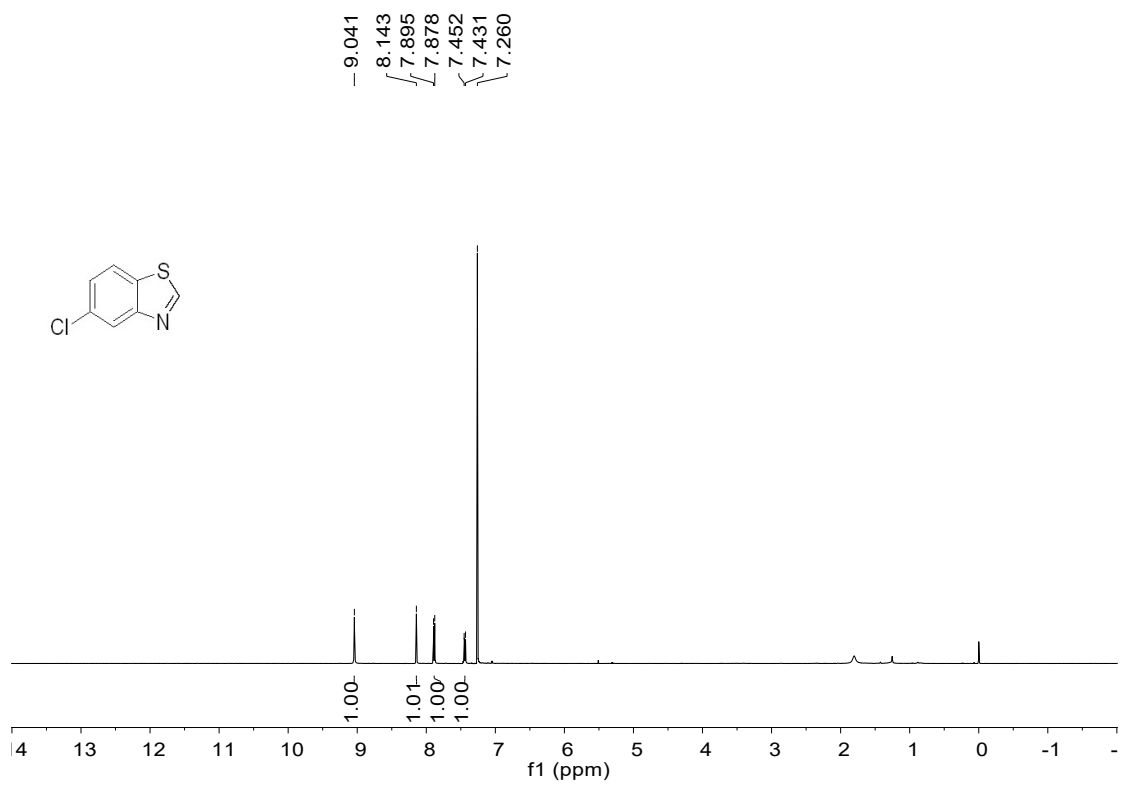

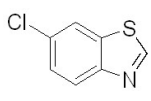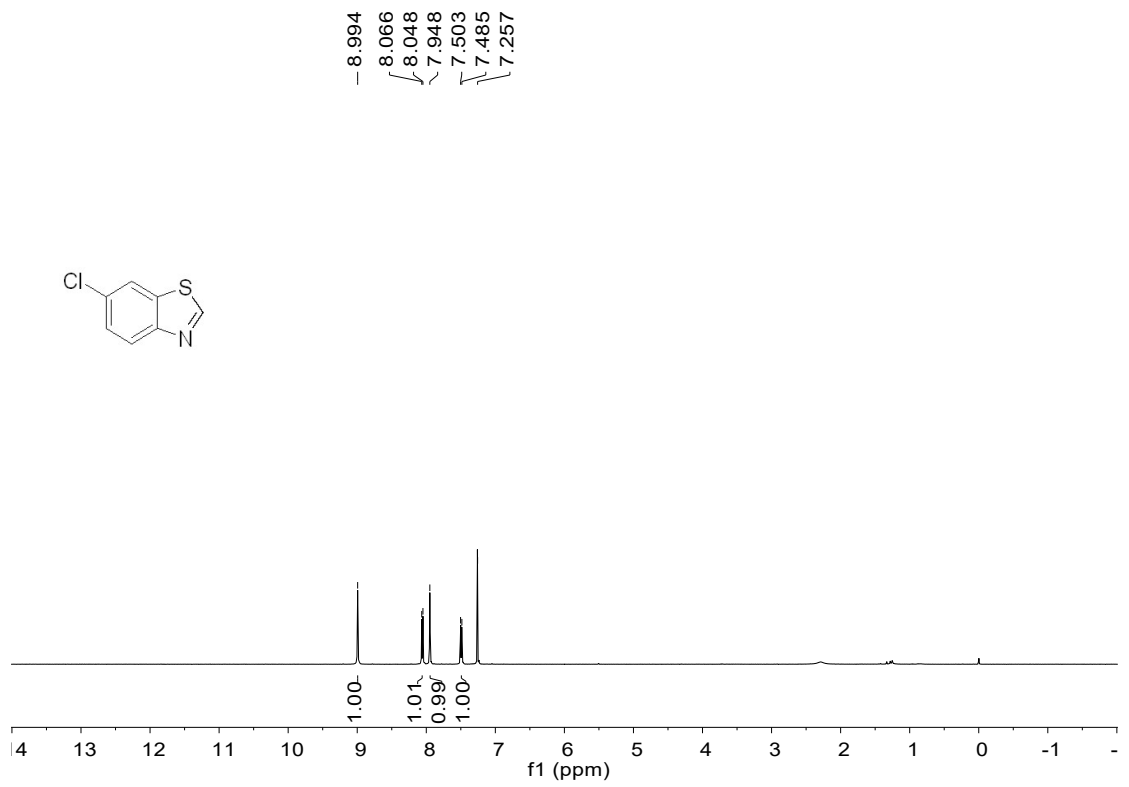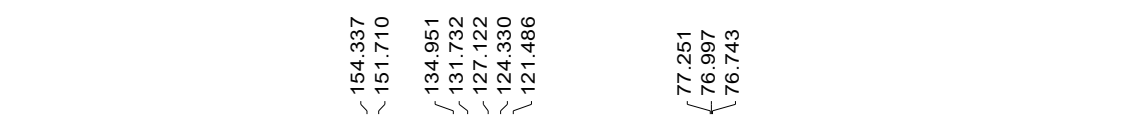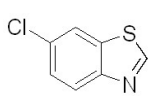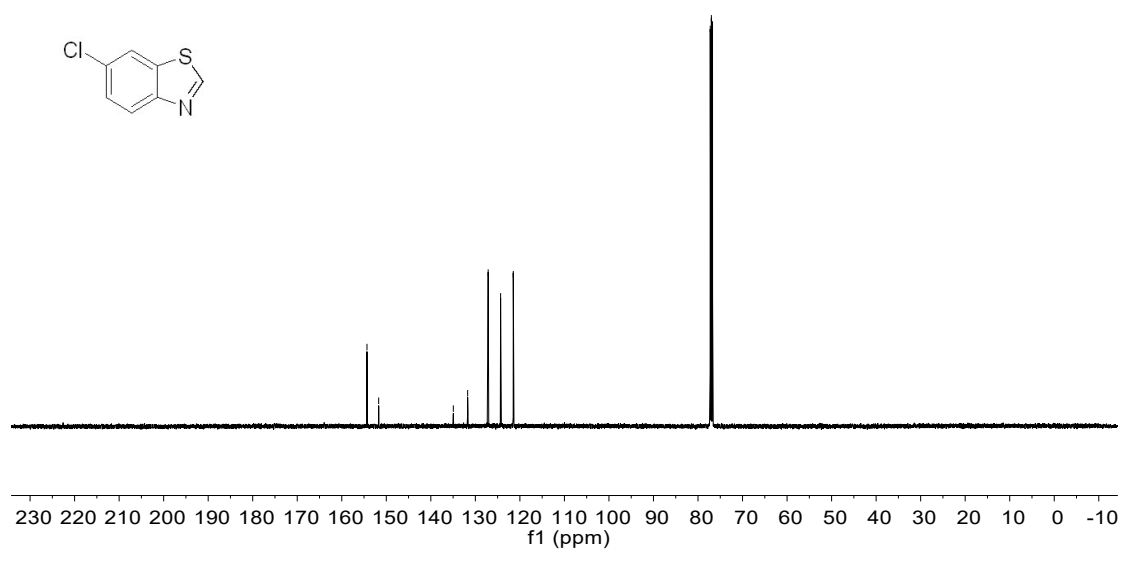

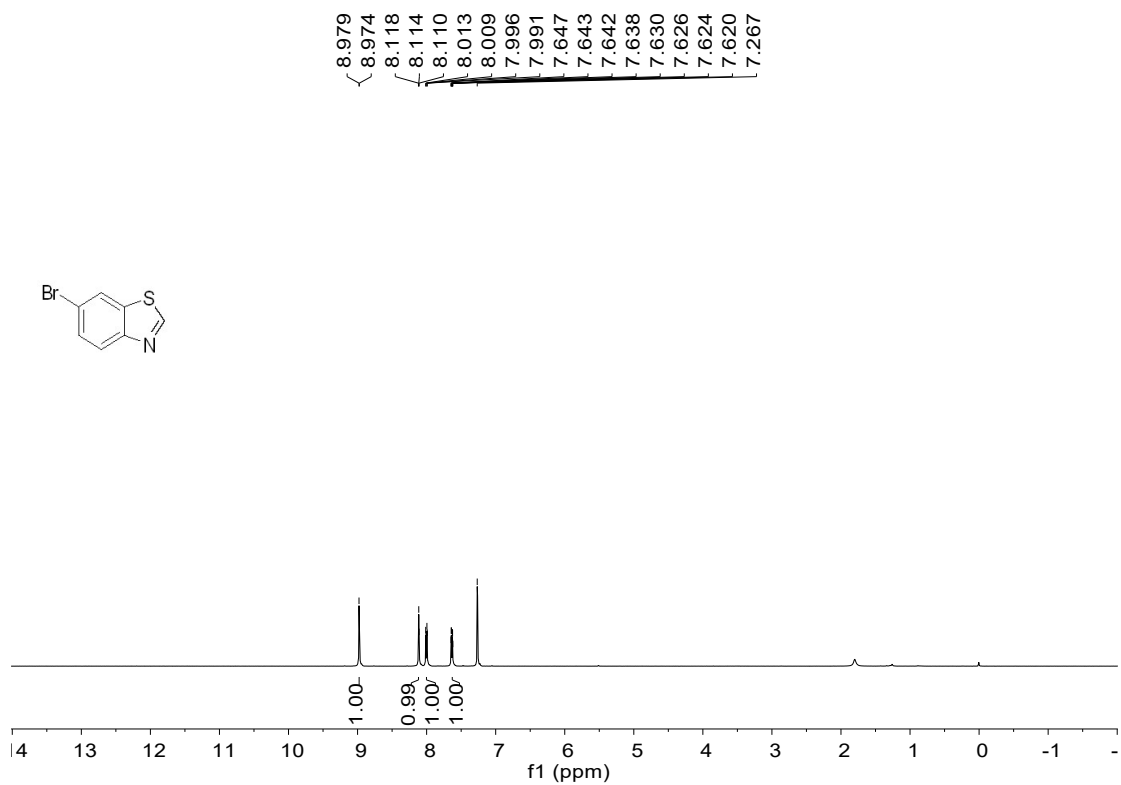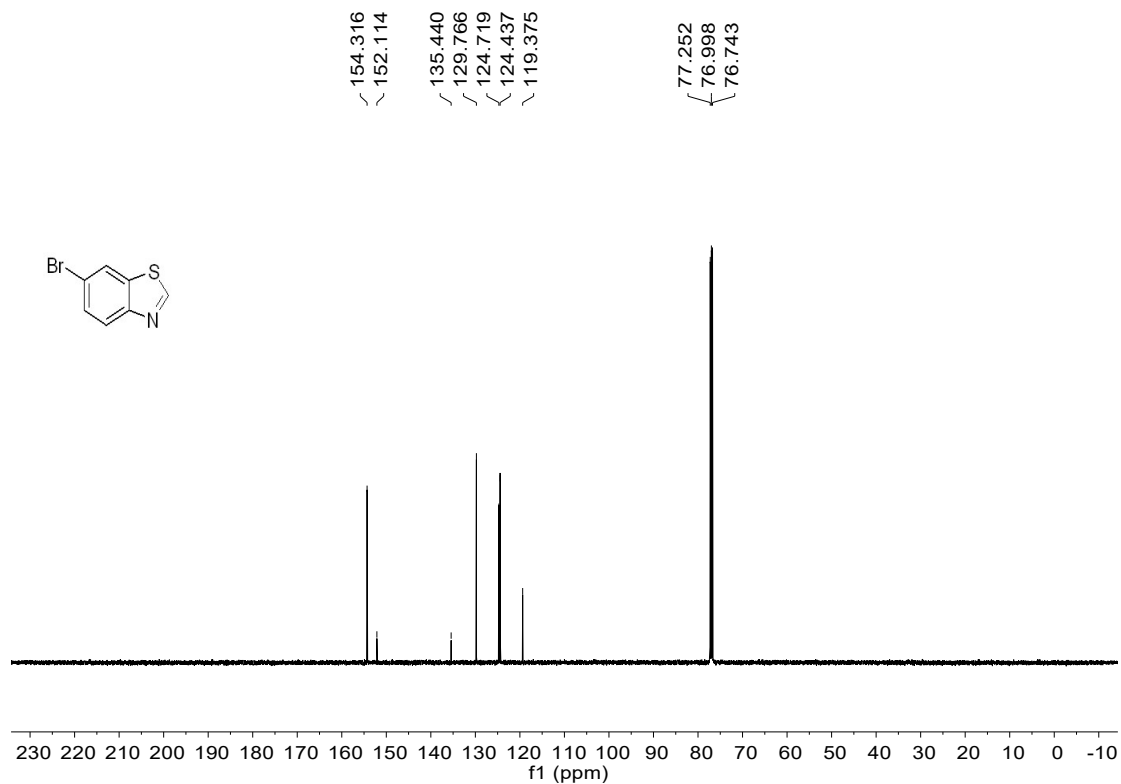

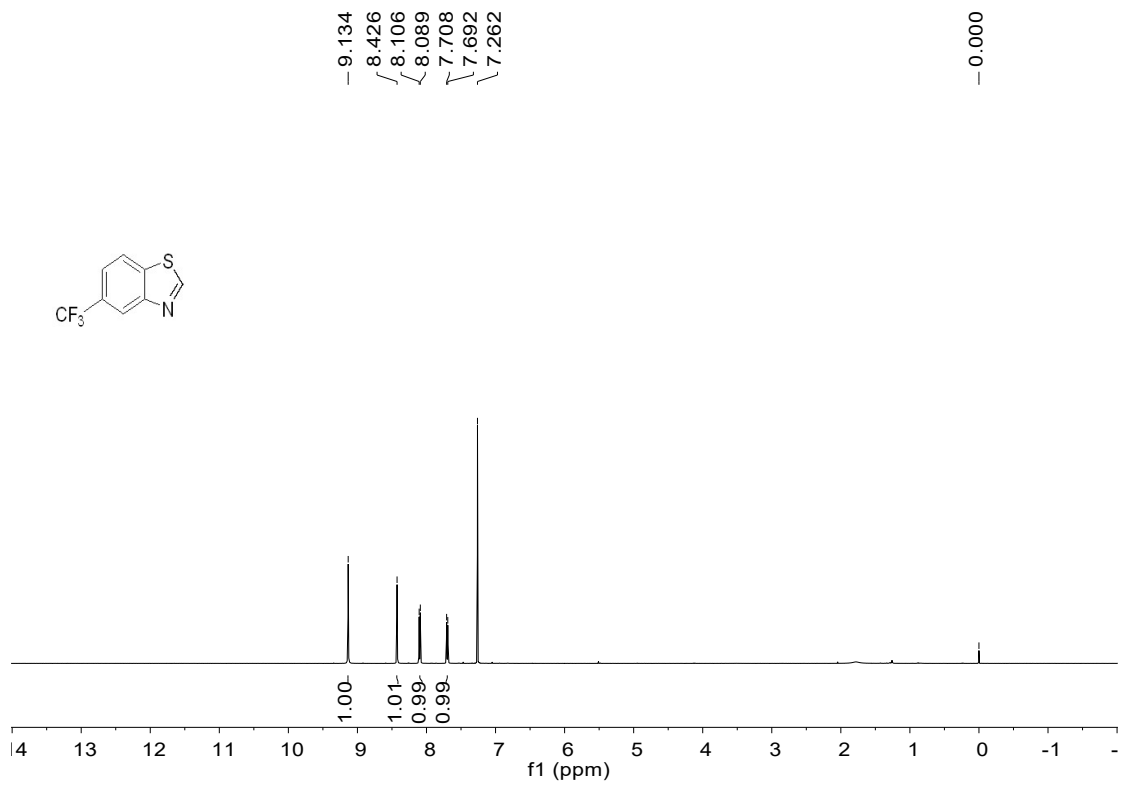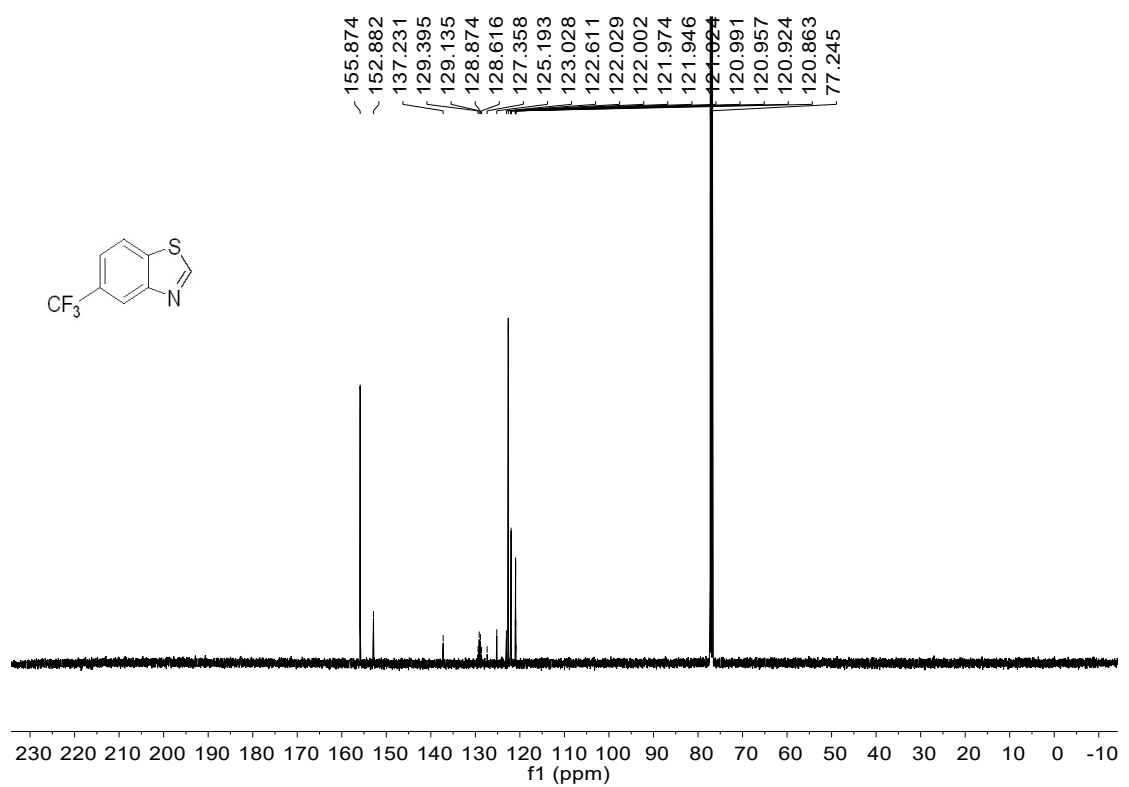

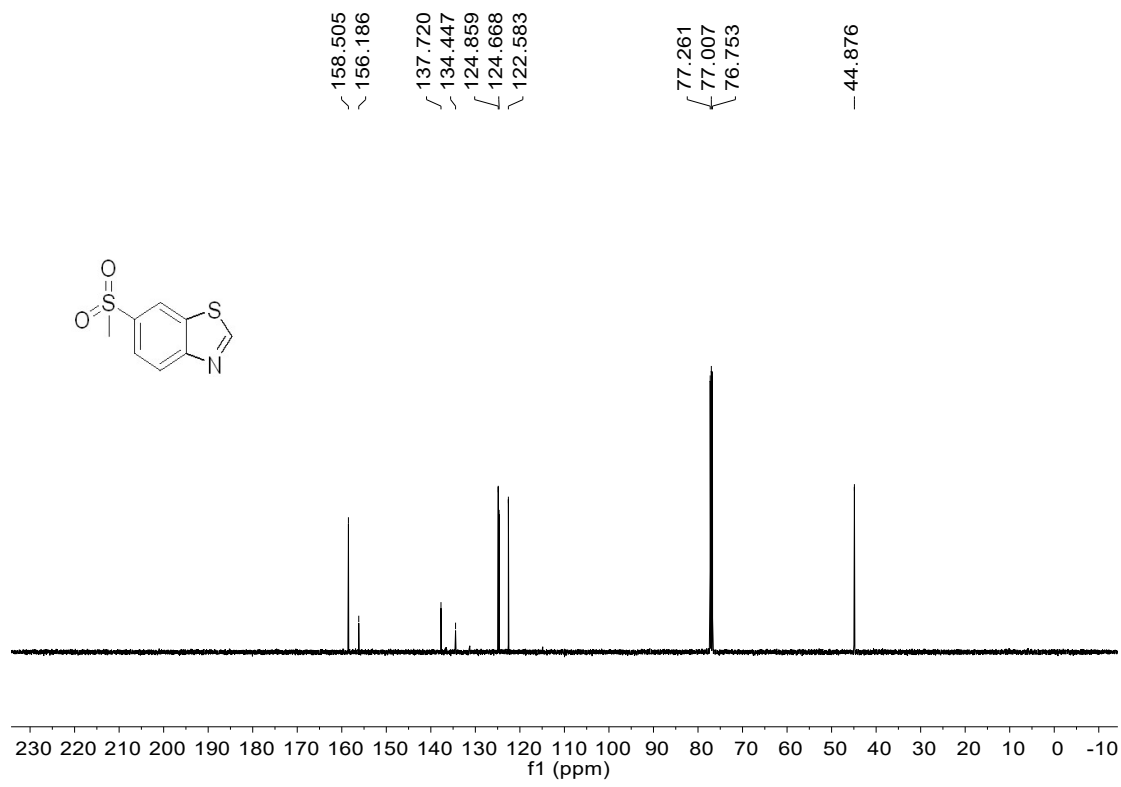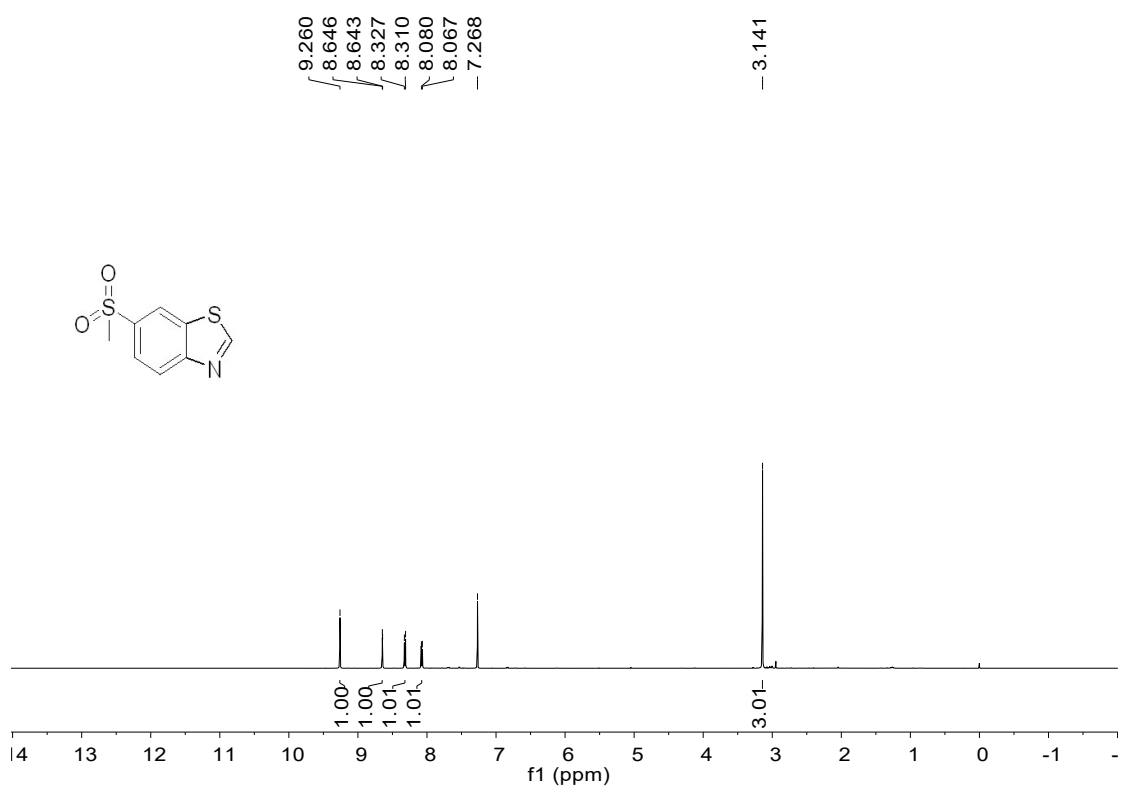



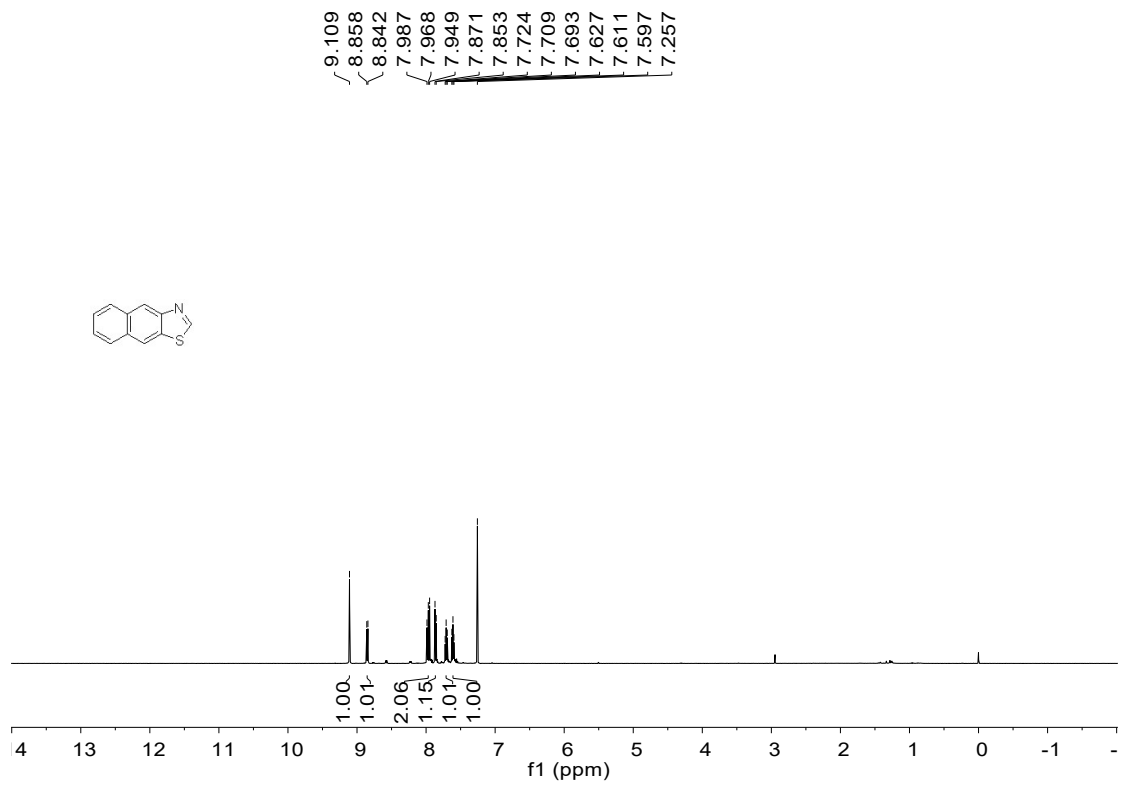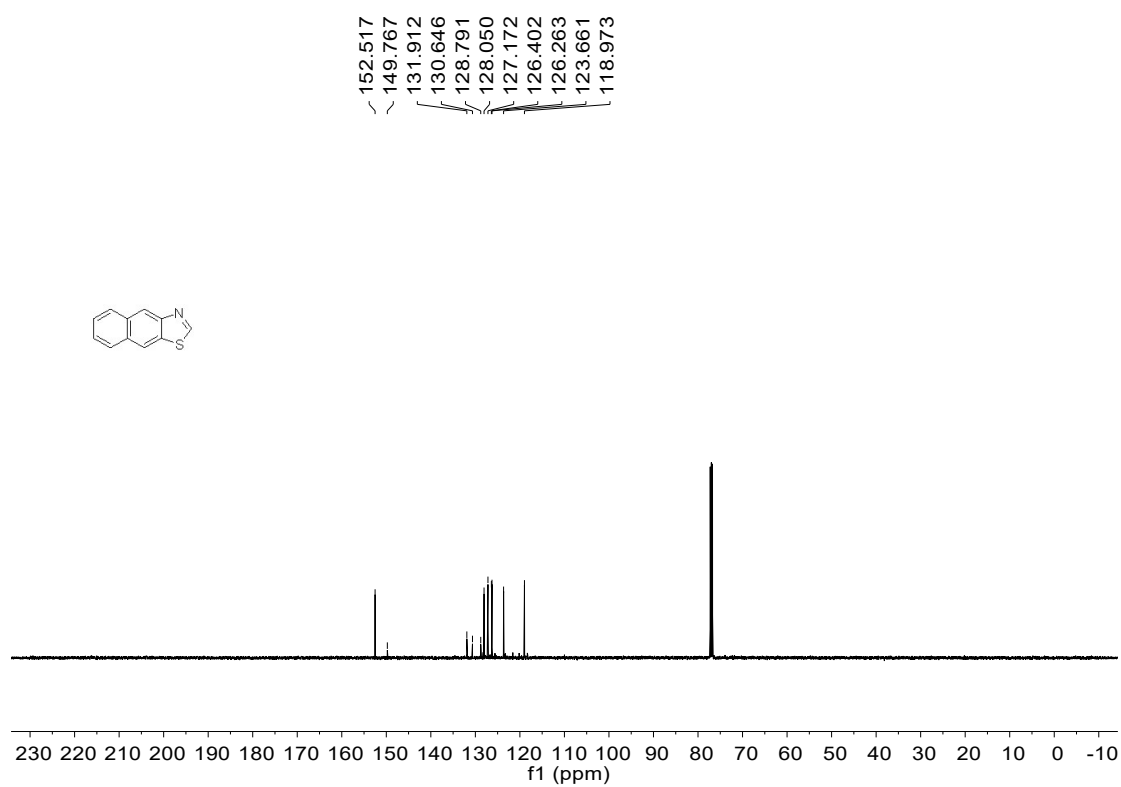

Supplement: d2ra03134e1.pdf [file d2ra03134e1.pdf]
